# Supplementary material for: Trade-off between Multiple Constraints Enables Simultaneous Formation of Modules and Hubs in Neural Systems
Source: PLoS Comput Biol. 2013 Mar 7;9(3):e1002937. doi: 10.1371/journal.pcbi.1002937 (PMC3591279; doi:10.1371/journal.pcbi.1002937)
Supplement: Table S1 — The list of the labels of 103 cortical areas in Macaque is provided on-line. (XLS) [file pcbi.1002937.s011.xls]

## Sheet: Sheet1
Macaque cortical area
1
10m
10o
11l
11m
12l
12m
12o
12r
13a
13b
13l
13m
14c
14r
2
23
24a
24b
24c
25
29
30
32
35
36
3a
3b
4
45
46
4C
5
6
6d
6va
6vb
6DC
6DR
6DS
6m
6Val
6Vam
7a
7b
8
9
A1
AITd
AITv
CITd
CITv
DP
FEF
FST
G
IPa
Iai
Ial
Iam
Id
Ig
LIP
LIPd
LIPv
LOP
MDP
MIP
MSTd
MSTda
MSTdp
MSTl
MSTm
MT
PIP
PITd
PITv
PO
PrCO
Ri
SII
SMA
SMA-proper
SMAr
STPa
STPp
TF
TH
TPOc
TPOi
TPOr
V1
V2
V3
V3A
V4
V4t
V4ta
V4tp
VIP
VIPl
VIPm
VOT
