# Supplementary material for: Trade-off between Multiple Constraints Enables Simultaneous Formation of Modules and Hubs in Neural Systems
Source: PLoS Comput Biol. 2013 Mar 7;9(3):e1002937. doi: 10.1371/journal.pcbi.1002937 (PMC3591279; doi:10.1371/journal.pcbi.1002937)
Supplement: Table S2 — The list of the names of 276 neurons in C. elegans is provided on-line. (XLS) [file pcbi.1002937.s012.xls]

## Sheet: Sheet1
C.elegans neuron
ADAL
ADAR
ADEL
ADER
ADFL
ADFR
ADLL
ADLR
AFDL
AFDR
AIAL
AIAR
AIBR
AIML
AIMR
AINL
AINR
AIYR
AIZL
AIZR
ALA
ALML
ALMR
ALNL
ALNR
AQR
AS1
AS10
AS11
AS2
AS3
AS4
AS5
AS6
AS7
AS8
AS9
ASEL
ASER
ASGL
ASGR
ASHL
ASHR
ASIL
ASIR
ASJL
ASJR
ASKL
ASKR
AUAL
AUAR
AVAL
AVAR
AVBL
AVBR
AVDL
AVDR
AVEL
AVER
AVFL
AVFR
AVG
AVHL
AVHR
AVJL
AVJR
AVKL
AVKR
AVL
AVM
AWAL
AWAR
AWBL
AWBR
AWCL
AWCR
BAGL
BAGR
BDUL
BDUR
CEPDL
CEPDR
CEPVL
CEPVR
DA1
DA2
DA3
DA4
DA5
DA6
DA7
DA8
DA9
DB1
DB2
DB3
DB4
DB5
DB6
DB7
DD1
DD2
DD3
DD4
DD5
DD6
DVA
DVB
DVC
FLPL
FLPR
HSNL
HSNR
IL1DL
IL1DR
IL1L
IL1R
IL1VL
IL1VR
IL2DL
IL2DR
IL2L
IL2R
IL2VL
IL2VR
LUAL
LUAR
OLLL
OLLR
OLQDL
OLQDR
OLQVL
OLQVR
PDA
PDB
PDEL
PDER
PHAL
PHAR
PHBL
PHBR
PHCL
PHCR
PLML
PLMR
PLNL
PLNR
PQR
PVCL
PVCR
PVDL
PVDR
PVM
PVNL
PVNR
PVPL
PVPR
PVQL
PVQR
PVR
PVT
PVWL
PVWR
RIAL
RIAR
RIBL
RIBR
RICL
RICR
RID
RIFL
RIFR
RIGL
RIGR
RIH
RIML
RIMR
RIPL
RIPR
RIR
RIS
RIVL
RIVR
RMDDL
RMDDR
RMDL
RMDR
RMDVL
RMDVR
RMED
RMEL
RMER
RMEV
RMFL
RMFR
RMGL
RMGR
RMHL
RMHR
SAADL
SAADR
SAAVL
SAAVR
SABD
SABVL
SABVR
SDQL
SDQR
SIADL
SIADR
SIAVL
SIAVR
SIBDL
SIBDR
SIBVL
SIBVR
SMBDL
SMBDR
SMBVL
SMBVR
SMDDL
SMDDR
SMDVR
URADL
URADR
URAVL
URAVR
URBL
URBR
URXL
URXR
URYDL
URYDR
URYVL
URYVR
VA1
VA10
VA11
VA12
VA2
VA3
VA4
VA5
VA6
VA7
VA8
VA9
VB1
VB10
VB11
VB2
VB3
VB4
VB5
VB6
VB7
VB8
VB9
VC1
VC2
VC3
VC4
VC5
VC6
VD1
VD10
VD11
VD12
VD13
VD2
VD3
VD4
VD5
VD7
VD8
VD9
